# Supplementary material
Source: Springer Nature journal article supplement (https://www.springermedizin.de/resource/supplementary/12913_2011_1817_MOESM1_ESM.pdf/9529040)

## European Union policies and regulations

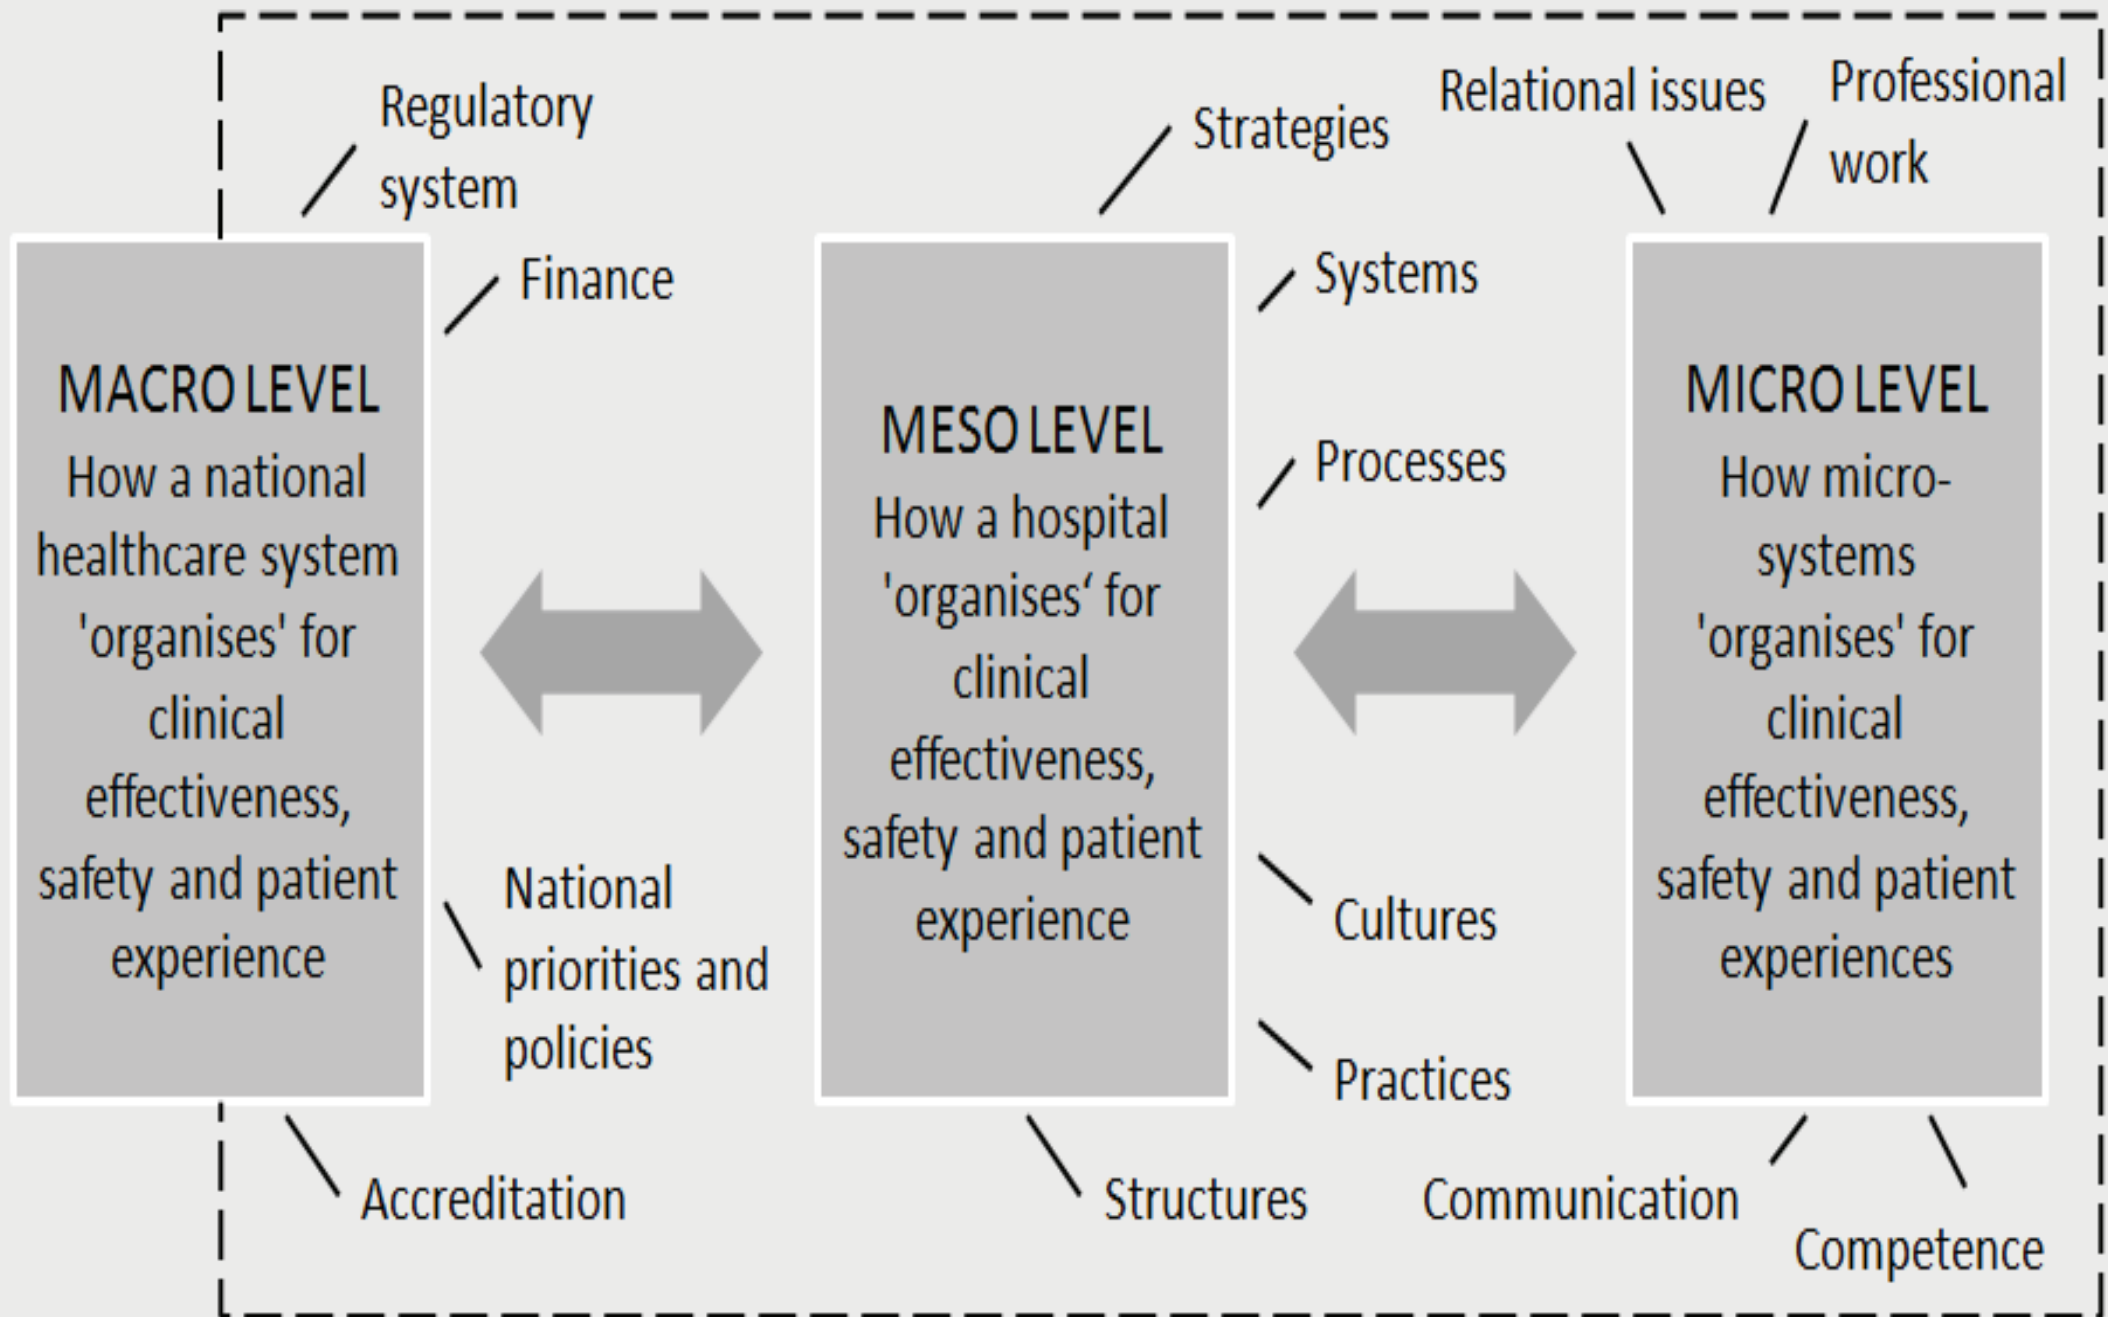

Supplement: MOESM1 [file 9529040]
